# Supplementary material for: Isolation and expression analysis of Salt Overly Sensitive gene family in grapevine (Vitisvinifera) in response to salt and PEG stress
Source: PLoS One. 2019 Mar 19;14(3):e0212666. doi: 10.1371/journal.pone.0212666 (PMC6424420; doi:10.1371/journal.pone.0212666)
Supplement: S6 Table — All data were obtained from three independent experiments with three biological replicates. (XLSX) [file pone.0212666.s006.xlsx]

## Sheet: Sheet1
			S6 Table Relative expression level of VviSOS3 genes in leaves under NaCl (250mM) stress treatment.
			X	Y
				1H	4H	8H	12H	24H	36H
			VvSOS3.1	0.526965	0.869652	1.39962	3.42111	1.86211	0.416025
				0.520832	0.873652	1.41448	3.40149	1.88598	0.427892
				0.533898	0.870641	1.40755	3.4114	1.88905	0.415332
			VvSOS3.2	1.59476	1.35901	0.620169	2.14946	0.097072	0.270482
				1.60863	1.36828	0.624037	2.1772	0.11094	0.27735
				1.59492	1.36595	0.617103	2.17333	0.114006	0.270416
			VvSOS3.3	1.22034	2.53205	2.20493	3.9245	5.25578	6.86921
				1.2319	2.53183	2.21198	3.92837	5.23965	7.00308
				1.23043	2.53853	2.21186	3.93143	5.26271	6.99615
			VvSOS3.4	0.596302	1.83051	1.08166	2.98151	0.22188	1.97918
				0.610169	1.84438	1.09553	2.97538	0.225747	1.98305
				0.603236	1.83744	1.0886	2.98844	0.228814	1.97612
			VvSOS3.5	1.96532	1.78891	3.82043	3.92063	8.19569	3.21726
				1.96118	1.80277	3.83043	3.93837	8.20955	3.21113
				1.96225	1.78584	3.82743	3.9245	8.19262	3.22419
			VvSOS3.6	0.737242	0.984592	1.84438	2.12173	3.09245	2.41294
				0.734977	0.977459	1.85824	2.13559	3.11632	2.40947
				0.721109	0.991525	1.84131	2.13866	3.09938	2.42224
			VvSOS3.7	0.23188	0.345085	0.340787	0.27735	1.7473	2.62095
				0.235747	0.33282	0.338787	0.271217	1.74117	2.60182
				0.228814	0.318952	0.336687	0.284284	1.75424	2.62789
			VvSOS3.8	2.7323	2.28814	3.3698	5.76888	1.6225	7.2527
				2.72189	2.302	3.38367	5.75762	1.65023	7.26656
				2.7319	2.29507	3.36673	5.72605	1.64636	7.26963
			VvSOS3.9	2.7319	7.76579	3.48074	4.86749	6.04622	1.66261
				2.74318	7.76966	3.47461	4.85522	6.04961	1.67382
				2.72522	7.70273	3.48767	4.88136	6.04615	1.6553
